# Supplementary material
Source: Springer Nature journal article supplement (https://www.springermedizin.de/resource/supplementary/12885_2013_4149_MOESM5_ESM.pdf/9465546)

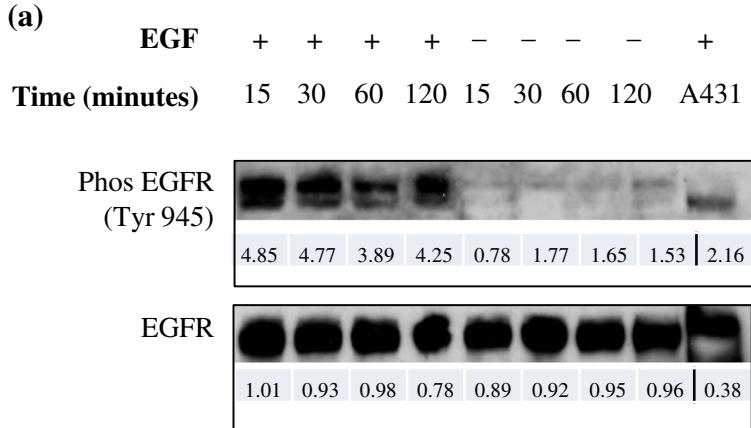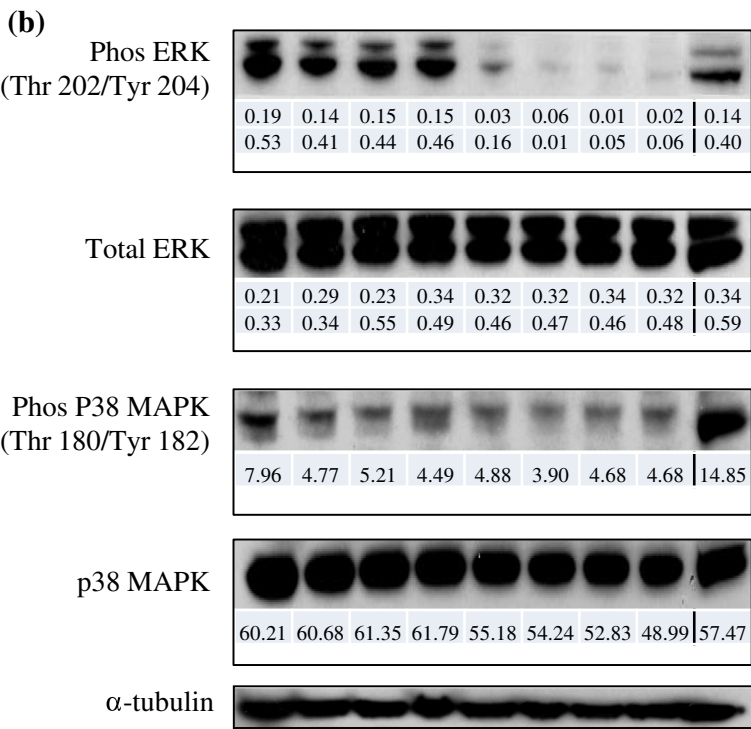

Supplement: MOESM5 [file 9465546]
